# Supplementary material for: Bioinspired and Photo-Clickable Thiol-Ene Bioinks for the Extrusion Bioprinting of Mechanically Tunable 3D Skin Models
Source: MDPI journal article supplement (doi:10.3390/biomimetics9040228), 2024-04-10
Supplement: s1 [file s1]

## Supporting Information

### Bioinspired and Photo-Clickable Thiol-Ene Bioinks for the Extrusion Bioprinting of Mechanically Tunable 3D Skin Models

Luís B. Bebiano <sup>1,2</sup>, Rafaela Presa <sup>1,2,3</sup>, Francisca Vieira <sup>1,2</sup>, Bianca N. Lourenço <sup>1,2</sup> and Rúben F. Pereira <sup>1,2,3,\*</sup>

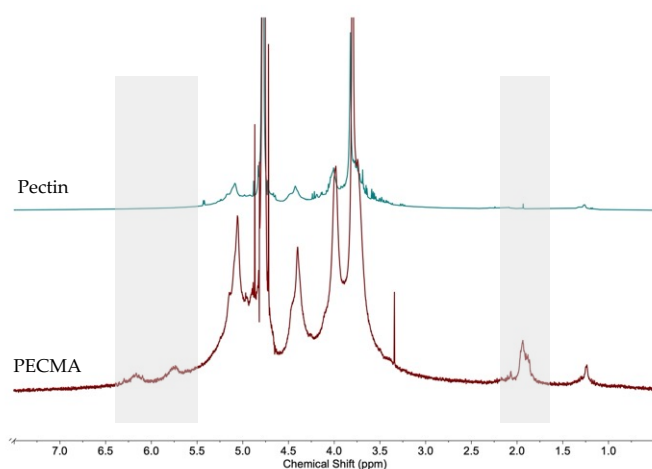

**Figure S1.** <sup>1</sup>H NMR spectra of pectin and pectin methacrylate (PECMA), showing two new peaks in PECMA (5.50–6.50 ppm) assigned to the methylene group in the vinyl bonds and a sharp peak at 1.90 ppm corresponding to the methyl group. Degree of methacrylation is ~20% and was calculated as detailed [5].

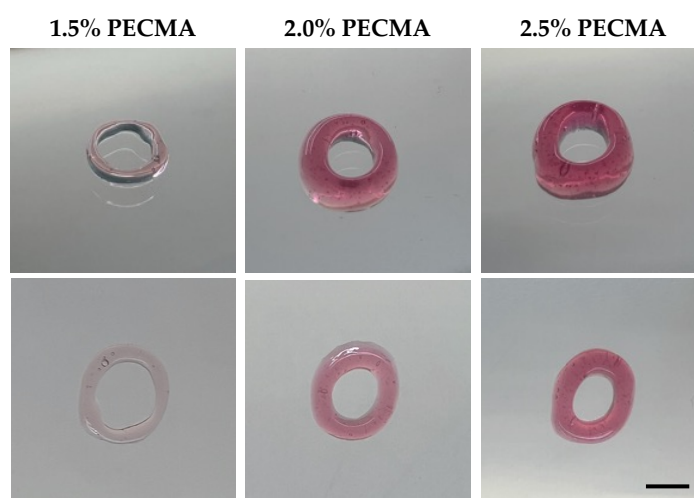

**Figure S2.** Representative images (top: isometric view; bottom: top view) of bioprinted hollow constructs ( $\varnothing = 10$  mm) created using ionically crosslinked PECMA inks (6 mM  $\text{CaCl}_2$ ). Inks were extrusion bioprinted into 10 layers constructs, sustaining the shape without photocrosslinking in a polymer concentration-dependent manner (scale bar: 5 mm).

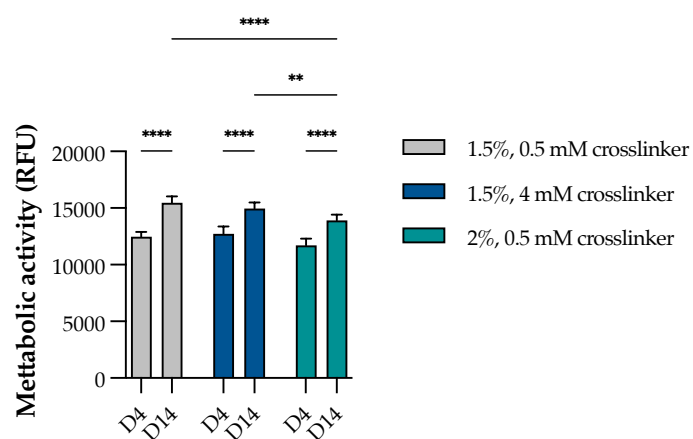

**Figure S3.** Metabolic activity of dermal fibroblasts within double crosslinked PECMA hydrogels (6 mM CaCl<sub>2</sub>, 2 mM RGD) prepared with varying polymer contents (1.5% and 2%) and MMP-peptide crosslinker concentrations (0.5 mM and 4 mM) at days 4 and 14 of culture (\*\* $p < 0.01$ , \*\*\*\* $p < 0.0001$ ).
